# Supplementary material for: Psychological Distress and Coping Ability of Women at High Risk of Hereditary Breast and Ovarian Cancer before Undergoing Genetic Counseling—An Exploratory Study from Germany
Source: MDPI journal article supplement (doi:10.3390/ijerph18084338), 2021-04-19
Supplement: s1 [file s1]

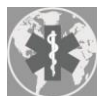

Table S1. Measurements (all items were translated verbatim from German)

|                                                                                                                                                                                                                                                                                                                                                              |                                      |
|--------------------------------------------------------------------------------------------------------------------------------------------------------------------------------------------------------------------------------------------------------------------------------------------------------------------------------------------------------------|--------------------------------------|
| <b>Genetic risk perception</b><br>“How do you currently assess your personal hereditary risk (from 0-100)”                                                                                                                                                                                                                                                   | 0-100                                |
| <b>Self-assessment of suffering from mental illness</b><br>“Do you suffer from mental illness (e.g. depression)”<br>“If yes: which?”                                                                                                                                                                                                                         | yes/no<br>open ended                 |
| <b>Self-assessment of suffering from concentration or memory dysfunctions</b><br>“Do you suffer from concentration or memory problems?”                                                                                                                                                                                                                      | yes/no                               |
| <b>Self-assessment of suffering from insomnia</b><br>“Do you suffer from insomnia?”                                                                                                                                                                                                                                                                          | yes/no                               |
| <b>Exposure to stress currently or in the last two years</b><br>“Are you currently or in the last two years burdened (stress) ...<br>...due to partnership problems (e.g., separation)?”<br>...due to problems within the family (e.g., worries about the children)?”<br>...due to job-related problems (e.g., bullying)?”<br>...due to financial problems?” | yes/no<br>yes/no<br>yes/no<br>yes/no |
| <b>Self-assessment as rather pessimistic and anxious</b><br>“How do you rate yourself?<br>I am generally more pessimistic.”<br>I am generally rather anxious.”                                                                                                                                                                                               | yes/no<br>yes/no                     |
| <b>Problems with genetic testing</b><br>“Are you having problems with the genetic test?<br>I cannot cope with the test result.”<br>My relatives cannot cope with the test result.”<br>I am afraid of the future (family planning etc.).”<br>I am concerned about my health.”                                                                                 | yes/no<br>yes/no<br>yes/no<br>yes/no |
| <b>Request of psychological counselling</b><br>“Would you currently like to receive psychological counselling?<br>...in decision support?”<br>...in helping to cope?”                                                                                                                                                                                        | yes/no<br>yes/no                     |
